# Supplementary material
Source: publisher site journal article supplement (https://www.spandidos-publications.com/2822/downloadSupplementary)
Supplement: Supplementary file 1 [file downloadSupplementary]

Table SI. Primers used in the present study.

| Gene                            | Primer                           | Primer sequence (5'-3')                           |
|---------------------------------|----------------------------------|---------------------------------------------------|
| IgG heavy chain variable region | Sense primer pool (VH1-VH6)      | Primer sequence provided in a previous study (22) |
| IgG heavy chain constant region | Antisense primer (IGHGc-R1)      | GAGTCCTGAGGACTGTAGGACAG                           |
| IgG variable region (2nd PCR)   | Internal sense primer (VH-FR2)   | TGGRTCCGVCAGSCYCCNGG                              |
|                                 | Internal antisense primer (JH)   | AACTGCAGAGGAGACGGTGACC                            |
| PTEC-specific marker gene       | External sense primer (LRP2)     | GGAGGTGCAGACCTAAAGGAG                             |
|                                 | External antisense primer (LRP2) | CACAACAGCGCAGCCAAT                                |
|                                 | Internal sense primer (LRP2)     | GTGCAGACCTAAAGGAGCGTT                             |
|                                 | Internal antisense primer (LRP2) | ATGCAATGCCCACTTCCACA                              |
| B-cell marker gene              | External sense primer (CD19)     | GAGGGAGATAGGCACGGATGG                             |
|                                 | External antisense primer (CD19) | AACATTGCTCCAGAGGTTGGC                             |
|                                 | Internal sense primer (CD19)     | GTGGCTACTGGCTTTCAGG                               |
|                                 | Internal antisense primer (CD19) | CAGGTGTGAATCTTGGGGACTT                            |

IgG, immunoglobulin G; PTEC, proximal tubular epithelial cell.

Table SII. Thermocycling conditions used for PCR.

| Gene           | Initial denaturation | Denaturation | Annealing    | Extension    | Cycles | Extension    |
|----------------|----------------------|--------------|--------------|--------------|--------|--------------|
| IgC $\gamma$   | 95°C, 5 min          | 95°C, 30 sec | 56°C, 30 sec | 72°C, 30 sec | 35     | 72°C, 10 min |
| IgC $\gamma$ 4 | 95°C, 5 min          | 95°C, 30 sec | 60°C, 30 sec | 72°C, 30 sec | 35     | 72°C, 10 min |
| IgC $\kappa$   | 95°C, 5 min          | 95°C, 30 sec | 62°C, 30 sec | 72°C, 30 sec | 35     | 72°C, 10 min |
| IgC $\lambda$  | 95°C, 5 min          | 95°C, 30 sec | 56°C, 30 sec | 72°C, 30 sec | 35     | 72°C, 10 min |
| AID            | 95°C, 5 min          | 95°C, 30 sec | 60°C, 30 sec | 72°C, 30 sec | 35     | 72°C, 10 min |
| LRP2           | 95°C, 5 min          | 95°C, 30 sec | 60°C, 30 sec | 72°C, 30 sec | 35     | 72°C, 10 min |
| CD19           | 95°C, 5 min          | 95°C, 30 sec | 60°C, 30 sec | 72°C, 30 sec | 35     | 72°C, 10 min |
| RAG1/2         | 95°C, 5 min          | 95°C, 30 sec | 56°C, 30 sec | 72°C, 30 sec | 16     |              |
|                |                      | 95°C, 30 sec | 54°C, 30 sec | 72°C, 30 sec | 18     | 72°C, 10 min |
| IgV $\gamma$   | 95°C, 5 min          | 95°C, 30 sec | 60°C, 30 sec | 72°C, 30 sec | 3      |              |
|                |                      | 95°C, 30 sec | 58°C, 30 sec | 72°C, 30 sec | 3      |              |
|                |                      | 95°C, 30 sec | 56°C, 30 sec | 72°C, 30 sec | 3      |              |
|                |                      | 95°C, 30 sec | 54°C, 30 sec | 72°C, 30 sec | 3      |              |
|                |                      | 95°C, 30 sec | 52°C, 30 sec | 72°C, 30 sec | 3      |              |
|                |                      | 95°C, 30 sec | 50°C, 30 sec | 72°C, 30 sec | 3      |              |
|                |                      | 95°C, 30 sec | 48°C, 30 sec | 72°C, 30 sec | 20     | 72°C, 10 min |

IgC, constant region; IgV, variable region.
